# Supplementary material for: Not seeing the grass for the trees: Timber plantations and agriculture shrink tropical montane grassland by two-thirds over four decades in the Palani Hills, a Western Ghats Sky Island
Source: PLOS journal article supplement (doi:10.1371/journal.pone.0190003), 2018-01-10

S17 Fig. Independent variable used for calibration of LRM – 1993 plantation 7 cells window

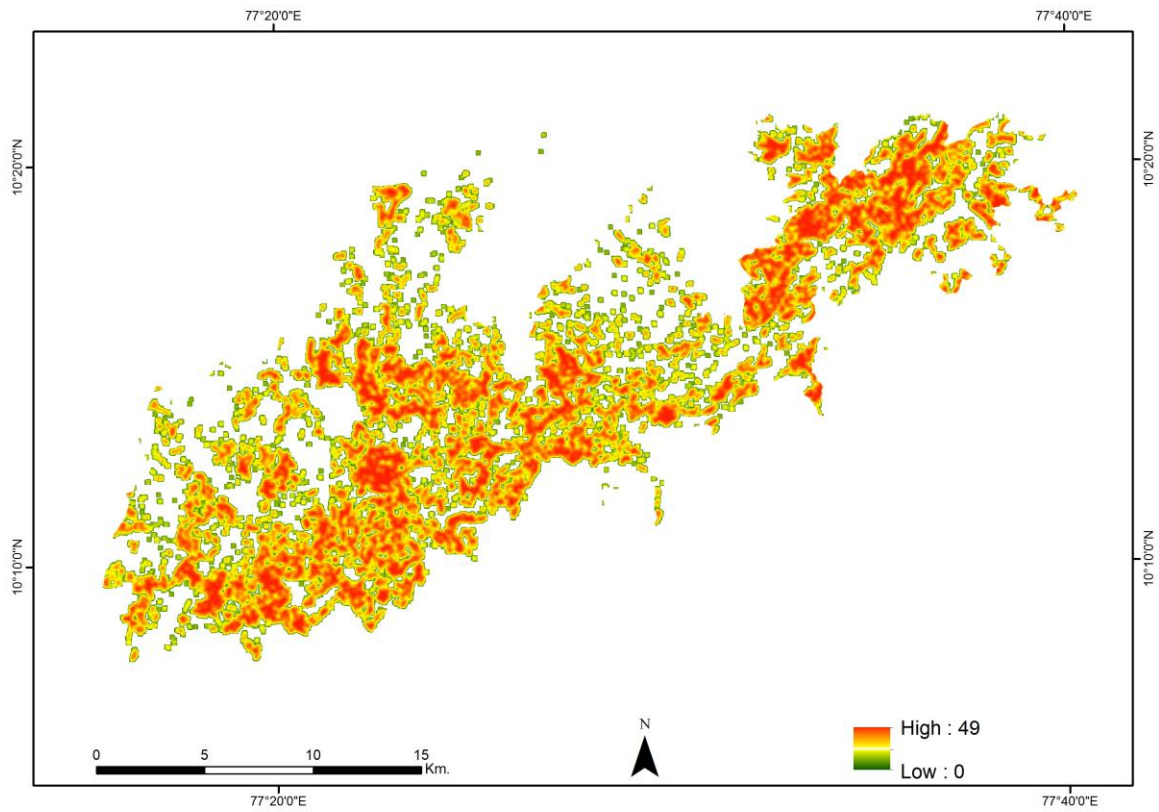

Supplement: S22 (10.1371/journal.pone.0190003.s022) [file journal.pone.0190003.s022]
